# Supplementary material for: Comparison of efficacy of anti-diabetics on non-diabetic NAFLD: A network meta-analysis
Source: PubMed Central journal article supplement (PMC9868463; doi:10.3389/fphar.2022.1096064), 2023-01-09
Supplement: DataSheet1.pdf [file DataSheet1.pdf]

*Supplementary Material*

**1 Supplementary Figures**

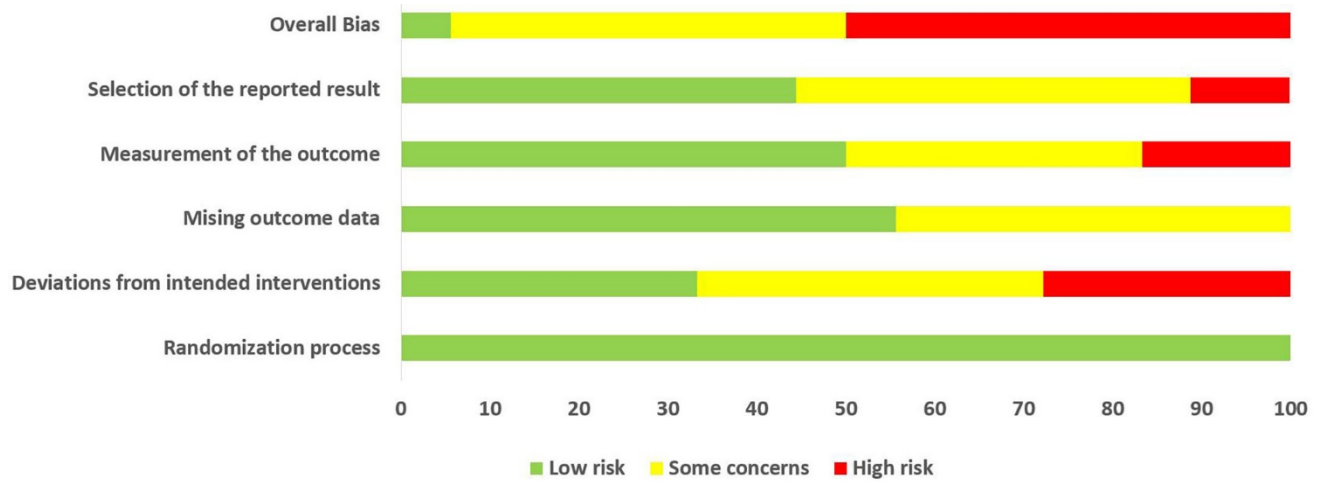

**Figure S1.** Risk of bias graph assessed with RoB2: review authors' judgement about each risk of bias item presented as percentages across all included studies in this trial

| Studies               | Randomization process | Deviations from intended interventions | Missing outcome data | Measurement of the outcome | Selection of the reported result | Overall |
|-----------------------|-----------------------|----------------------------------------|----------------------|----------------------------|----------------------------------|---------|
| Uygun2004             | +                     | ?                                      | +                    | ?                          | +                                | ?       |
| Cui2006               | +                     | +                                      | +                    | ?                          | +                                | ?       |
| Aithal2008            | +                     | +                                      | +                    | +                          | +                                | +       |
| Garinis2010           | +                     | +                                      | ?                    | +                          | +                                | !       |
| Hajiaghamohammadi2012 | +                     | ?                                      | +                    | +                          | +                                | !       |
| Sanchez-Munoz2013     | +                     | +                                      | ?                    | ?                          | ?                                | !       |
| Soifer2015            | +                     | ?                                      | +                    | +                          | +                                | !       |
| Hussain2016           | +                     | ?                                      | ?                    | +                          | ?                                | !       |
| Rana2016              | +                     | +                                      | ?                    | +                          | ?                                | ?       |
| Shahebrahimim2017     | +                     | ?                                      | ?                    | +                          | ?                                | !       |
| Yaghoubi2017          | +                     | ?                                      | +                    | ?                          | ?                                | ?       |
| Anushiravani2019      | +                     | +                                      | ?                    | ?                          | ?                                | !       |
| Khoo2019              | +                     | ?                                      | +                    | ?                          | ?                                | ?       |
| Taheri2020            | +                     | ?                                      | +                    | ?                          | +                                | ?       |
| Lee2022               | +                     | ?                                      | ?                    | +                          | ?                                | ?       |
| Mohammadi2022         | +                     | ?                                      | ?                    | +                          | ?                                | !       |
| Doustmohammadian2022  | +                     | ?                                      | +                    | ?                          | ?                                | ?       |
| Jin2010               | +                     | ?                                      | +                    | ?                          | +                                | ?       |

 Low risk  
 Some concerns  
 High risk

**Figure S2.** Risk of bias summary assessed with RoB2: review authors’ judgements about each risk of bias item for each included study in this trial

## 2. Supplementary Tables

**Table S1. Characteristics of the Studies included in the Network Meta-analysis**

| Author<br>(Year/Country)           | Age<br>(mean+SD)                   | Entry No.                 | Final No.                 | Intervention                                                                                                                                                    |                                                                  | Outcome<br>of interest |
|------------------------------------|------------------------------------|---------------------------|---------------------------|-----------------------------------------------------------------------------------------------------------------------------------------------------------------|------------------------------------------------------------------|------------------------|
|                                    |                                    |                           |                           | Experiment                                                                                                                                                      | Control                                                          |                        |
| Doustmohammadian(1)<br>(2022/Iran) | T:45.0(4.1)<br>C:39.0(2.6)         | T:60<br>C:60              | T:44<br>C:32              | Sitagliptin<br>Dosage:30mg<br>Freq.:1time/d<br>Duration:56wks                                                                                                   | Placebo                                                          | ALT,AST                |
| Mohammadi(2)<br>(2022/Iran)        | T:45.03(12.4<br>4)<br>C:44.4(2.07) | T:37<br>C:35              | T: 35<br>C: 35            | Metformin<br>Dosage:500mg<br>Freq.:1time/d<br>Duration:6mons                                                                                                    | Placebo                                                          | ALT,AST                |
| Lee(3)<br>(2022/USA)               | T: 50.4(2.3)<br>C: 53.1(2.2)       | T: 18<br>C: 17            | T: 18<br>C: 17            | Empagliflozin<br>Dosage:10mg<br>Freq.:1time/d<br>Duration:3mons                                                                                                 | Placebo                                                          | ALT                    |
| Taheri(4)<br>(2020/Iran)           | T: 43.8(9.7)<br>C: 44.1(9.3)       | T: 50<br>C: 50            | T: 43<br>C: 47            | Empagliflozin<br>Dosage:10mg<br>Freq.:1time/d<br>Duration:24wks                                                                                                 | Placebo                                                          | ALT,AST                |
| Khoo(5)<br>(2019/Singapore)        | T: 38.6(8.2)<br>C: 43.6(9.9)       | T: 15<br>C: 15            | T: 14<br>C: 13            | Liraglutide<br>Dosage:3mg<br>Freq.:1time/d<br>Duration:26wks                                                                                                    | DE                                                               | ALT,AST                |
| Anushiravani(6)<br>(2019/Iran)     | T1: NA<br>T2: NA<br>C: NA          | T1: 30<br>T2: 30<br>C: 30 | T1: 30<br>T2: 30<br>C: 30 | Lifestyle +<br>Pioglitazone<br>Dosage:15mg<br>Freq.:1time/d<br>Duration:3mons<br><br>Lifestyle+<br>Metformin<br>Dosage:500mg<br>Freq.:1time/d<br>Duration:3mons | Lifestyle+Placebo                                                | ALT,AST                |
| Yaghoubi(7)<br>(2017/Iran)         | T: 35(7)<br>C: 38(10)              | T: 30<br>C: 30            | T: 30<br>C: 30            | Pioglitazone<br>Dosage:30mg<br>Freq.:1time/d<br>Duration:12wks                                                                                                  | Placebo                                                          | ALT,AST                |
| Shahebrahimim(8)<br>(2017/Iran)    | T: NA<br>C: NA                     | T: 31<br>C: 31            | T: 31<br>C: 31            | Metformin<br>Dosage:2000mg<br>Freq.:1time/d<br>Duration:12wks                                                                                                   | Pioglitazone<br>Dosage:30mg<br>Freq.:1time/day<br>Duration:12wks | ALT,AST                |
| Rana(9)<br>(2016/India)            | T: NA<br>C: NA                     | T: 31<br>C: 33            | T: 31<br>C: 33            | Metformin<br>Dosage: N/A<br>Freq.: N/A<br>Duration: N/A                                                                                                         | Pioglitazone<br>Dosage: N/A<br>Freq.: N/A<br>Duration: N/A       | ALT,AST                |

## Supplementary Material

|                                      |                                |                |                |                                                                    |                                                                |         |
|--------------------------------------|--------------------------------|----------------|----------------|--------------------------------------------------------------------|----------------------------------------------------------------|---------|
| Hussain(10)<br>(2016/Pakistan)       | T: 28(15)<br>C: 31(12)         | T: 29<br>C: 29 | T: 29<br>C: 29 | Vildagliptin<br>Dosage:50mg<br>Freq.:1time/d<br>Duration:4mons     | Placebo                                                        | ALT,AST |
| Soifer(11)<br>(2015/Israel)          | T: 51.9(10.9)<br>C: 55.2(14.0) | T: 32<br>C: 31 | T: 27<br>C: 25 | Metformin<br>Dosage:850-1700mg<br>Freq.:1time/d<br>Duration:4mons  | Placebo                                                        | ALT,AST |
| Sanchez-Munoz(12)<br>(2013/Mexico)   | T: 39.50(6.0)<br>C: 38.5(8.5)  | T: 9<br>C: 10  | T: 8<br>C: 8   | Metformin<br>Dosage:1000mg<br>Freq.:1time/d<br>Duration:12wks      | Placebo                                                        | ALT,AST |
| Hajiaghamohammadi(13)<br>(2012/Iran) | T: 32.5(6.5)<br>C: 33.4 (6.6)  | T: 22<br>C: 22 | T: 22<br>C: 22 | Metformin<br>Dosage:500mg<br>Freq.:1time/d<br>Duration:2mons       | Pioglitazone<br>Dosage:15mg<br>Freq.:1time/d<br>Duration:2mons | ALT,AST |
| Jin(14)<br>(2010/China)              | T: 50.3(12.8)<br>C: 53.7(10.1) | T: 60<br>C: 60 | T: 60<br>C: 60 | Pioglitazone<br>Dosage:30mg<br>Freq.:1time/day<br>Duration:6mons   | Placebo                                                        | ALT,AST |
| Garinis(15)<br>(2010/Italy)          | T: 40.8(13)<br>C: 45.8(16.6)   | T: 25<br>C: 25 | T: 25<br>C: 25 | Diet+Metformin<br>Dosage:1000mg<br>Freq.:1time/d<br>Duration:6mons | Diet+Placebo                                                   | ALT,AST |
| Aithal(16)<br>(2008/UK)              | T: 52(10.75)<br>C: 55(11.5)    | T: 37<br>C: 37 | T: 37<br>C: 37 | Pioglitazone<br>Dosage:30mg<br>Freq.:1time/d<br>Duration:12mons    | Placebo                                                        | ALT     |
| Cui(17)<br>(2006/China)              | T: 46.2(2.6)<br>C: 45.5(2.0)   | T: 63<br>C: 61 | T: 63<br>C: 61 | Rosiglitazone<br>Dosage:4mg<br>Freq.:2times/d<br>Duration:24wks    | Placebo                                                        | ALT     |
| Uygun(18)<br>(2004/Turkey)           | T: 39.8(10.6)<br>C: 41.5(9.1)  | T: 17<br>C: 17 | T: 17<br>C: 17 | Metformin<br>Dosage:850mg<br>Freq.:2times/d<br>Duration:6mons      | Placebo                                                        | ALT,AST |

Note: T: experimental group, C: control group; ALT: Alanine transaminase, AST: Aspartate transaminase, N/A: not available; DE: Intervention of diet and exercise

**Supplementary Table S2.** Consistency test for ALT

|      |       | Coef.     | Std. Err. | z     | P> z  | [95% Conf. Interval] |           |
|------|-------|-----------|-----------|-------|-------|----------------------|-----------|
| _y_B | _cons | 11.72144  | 16.64819  | 0.70  | 0.481 | -20.90841            | 44.3513   |
| _y_C | _cons | -5.48314  | 7.518401  | -0.73 | 0.466 | -20.21893            | 9.252655  |
| _y_D | _cons | -7.289748 | 7.751363  | -0.94 | 0.347 | -22.48214            | 7.902644  |
| _y_E | _cons | -.2556842 | 6.558593  | -0.04 | 0.969 | -13.11029            | 12.59892  |
| _y_F | _cons | -308.0556 | 33.48223  | -9.20 | 0.000 | -373.6795            | -242.4316 |
| _y_G | _cons | 4.7444417 | 11.12789  | 0.43  | 0.670 | -17.06584            | 26.55467  |
| _y_H | _cons | -23.65558 | 11.38661  | -2.08 | 0.038 | -45.97294            | -1.338232 |

Note: B: Liraglutide, C: Metformin, D: Pioglitazone, E: Placebo, F: Rosiglitazone, G: Sitagliptazone, H: Vldagliptin

**Supplementary Table S3.** Consistency test for AST

|      |       | Coef.     | Std. Err. | z     | P> z  | [95% Conf. Interval] |           |
|------|-------|-----------|-----------|-------|-------|----------------------|-----------|
| _y_B | _cons | 2.201543  | 9.303728  | 0.24  | 0.813 | -16.03343            | 20.43651  |
| _y_C | _cons | -1.310306 | 5.10455   | -0.26 | 0.797 | -11.31504            | 8.694429  |
| _y_D | _cons | -3.309706 | 5.271829  | -0.63 | 0.530 | -13.6423             | 7.022888  |
| _y_E | _cons | 1.202752  | 4.702059  | 0.26  | 0.798 | -8.013115            | 10.41862  |
| _y_F | _cons | -.7973625 | 6.472593  | -0.12 | 0.902 | -13.48341            | 11.88869  |
| _y_G | _cons | -18.49736 | 6.973467  | -2.65 | 0.008 | -32.16511            | -4.829618 |

Note: B: Liraglutide, C: Metformin, D: Pioglitazone, E: Placebo, F: Sitagliptin, G: Vildagliptin

**Supplementary Table S4.** Inconsistency test for ALT

|      |        | Coef.     | Std.Err. | z     | P> z  | [95% Conf.Interval] |           |
|------|--------|-----------|----------|-------|-------|---------------------|-----------|
| _y_B | _cons  | 11.70183  | 16.72564 | 0.70  | 0.484 | -21.07981           | 44.48348  |
| _y_C | des_CE | -18.15474 | 10.78797 | -1.68 | 0.092 | -39.29877           | 2.989286  |
|      | _cons  | 9.691688  | 11.77855 | 0.82  | 0.411 | -13.39384           | 32.77722  |
| _y_D | des_DE | -6.935734 | 11.28878 | -0.61 | 0.539 | -29.06134           | 15.18987  |
|      | des_CD | 9.593643  | 11.20802 | 0.86  | 0.392 | -12.37367           | 32.56095  |
|      | _cons  | -.8929866 | 11.59127 | -0.08 | 0.939 | -23.61145           | 21.82548  |
| _y_E | _cons  | -.2752334 | 6.623881 | -0.04 | 0.967 | -13.2578            | 12.70734  |
| _y_F | _cons  | -308.0751 | 33.52088 | -9.19 | 0.000 | -373.7748           | -242.3754 |
| _y_G | _cons  | 4.724877  | 11.24366 | 0.42  | 0.674 | -17.31229           | 26.76204  |
| _y_H | _cons  | -23.67512 | 11.49978 | -2.06 | 0.040 | -46.21422           | -1.13597  |

Note: B: Liraglutide, C: Metformin, D: Pioglitazone, E: Placebo, F: Rosiglitazone, G: Sitagliptin, H: Vildagliptin

**Supplementary Table S5.** Inconsistency test for AST

|      |        | Coef.     | Std. Err. | z     | P> z  | [95% Conf. Interval] |           |
|------|--------|-----------|-----------|-------|-------|----------------------|-----------|
| _y_B | _cons  | 2.197834  | 9.922122  | 0.22  | 0.825 | -17.24917            | 21.64484  |
| _y_C | des_CE | -8.00444  | 6.205473  | -1.29 | 0.197 | -20.16694            | 4.158064  |
|      | _cons  | 4.494011  | 7.708769  | 0.58  | 0.560 | -10.6149             | 19.60292  |
| _y_D | des_DE | -.018628  | 6.894597  | 0.00  | 0.998 | -13.53179            | 13.49453  |
|      | des_CD | 2.229177  | 6.443337  | 0.35  | 0.729 | -10.39953            | 14.85789  |
|      | _cons  | -.9036758 | 7.56637   | -0.12 | 0.905 | -15.73349            | 13.92614  |
| _y_E | _cons  | 1.199107  | 5.295168  | 0.23  | 0.821 | -9.179232            | 11.57745  |
| _y_F | _cons  | -.8010434 | 7.334282  | -0.11 | 0.913 | -15.17597            | 13.57389  |
| _y_G | _cons  | -18.50104 | 7.779877  | -2.28 | 0.017 | -33.74932            | -3.252765 |

Note: B: Liraglutide, C: Metformin, D: Pioglitazone, E: Placebo, F: Sitagliptin, G: Vildagliptin

**Supplementary Table S6.** Assessment of heterogeneity for direct and indirect comparison of ALT between pair-wise and network meta-analysis

| Side  | Direct     |           | Indirect  |           | Difference |           | P>z   | tau      |
|-------|------------|-----------|-----------|-----------|------------|-----------|-------|----------|
|       | Coef.      | Std. Err. | Coef.     | Std. Err. | Coef.      | Std. Err. |       |          |
| A E * | -0.2820364 | 6.584492  | 3.549567  | 79.10769  | -3.831603  | 79.38126  | 0.962 | 8.891227 |
| B E * | -12        | 15.32018  | 11.49872  | 632.9031  | -23.49872  | 633.3345  | 0.970 | 8.887212 |
| C D   | -3.302809  | 4.975291  | 1.78138   | 7.751653  | -5.084189  | 9.216009  | 0.581 | 9.267283 |
| C E   | 4.92148    | 4.319877  | 6.563086  | 8.531789  | -1.641605  | 9.566199  | 0.864 | 9.392318 |
| D E   | 5.593106   | 5.274327  | 10.01849  | 7.445479  | -4.425379  | 9.118759  | 0.627 | 9.322768 |
| E F * | -307.8     | 32.83454  | -307.2884 | 633.5653  | -.5115851  | 632.8387  | 0.999 | 8.887212 |
| E G * | 5          | 8.993188  | 5.511586  | 632.7675  | -.5115861  | 632.8284  | 0.999 | 8.887212 |
| E H * | -23.4      | 9.31142   | -22.88842 | 632.8364  | -.511585   | 632.8927  | 0.999 | 8.88721  |

\* Warning: all the evidence about these contrasts comes from the trials which directly compare them. Note: A: Empagliflozin, B: Liraglutide, C: Metformin, D: Pioglitazone, E: Placebo, F: Rosiglitazone, G: Sitagliptazone, H: Vldagliptin



**Supplementary Table S7.** Assessment of heterogeneity for direct and indirect comparison of AST between pair-wise and network meta-analysis

| Side  | Direct    |           | Indirect   |           | Difference |           | P>z   | tau      |
|-------|-----------|-----------|------------|-----------|------------|-----------|-------|----------|
|       | Coef.     | Std. Err. | Coef.      | Std. Err. | Coef.      | Std. Err. |       |          |
| A E * | 1.200003  | 4.710889  | 2.089326   | 84.53104  | -0.8893232 | 84.6622   | 0.992 | 4.371837 |
| B E * | -1        | 8.031583  | 3.406478   | 632.6037  | -4.406478  | 632.7265  | 0.994 | 4.370394 |
| C D   | -3.769784 | 2.648147  | 3.054158   | 4.548644  | -6.823942  | 5.269469  | 0.195 | 4.413035 |
| C E   | 3.212062  | 2.308589  | -0.8555731 | 5.225918  | 4.067635   | 5.739683  | 0.479 | 4.72639  |
| D E   | 2.291683  | 3.083147  | 8.226549   | 3.976557  | -5.934866  | 5.058624  | 0.241 | 4.46077  |
| E F * | -2        | 4.448832  | -4.40604   | 632.51    | 2.40604    | 632.5245  | 0.997 | 4.370394 |
| E G * | -19.7     | 5.150427  | -22.10604  | 632.5152  | 2.406037   | 632.5245  | 0.997 | 4.370394 |

\* Warning: all the evidence about these contrasts comes from the trials which directly compare them. Note: A: Empagliflozin, B: Liraglutide, C: Metformin, D: Pioglitazone, E: Placebo, F: Sitagliptin, G: Vildagliptin

## References

1. Doustmohammadian A, Nezhadisalami A, Safarnezhad Tameshke F, Motamed N, Maadi M, Farahmand M, et al. A randomized triple-blind controlled clinical trial evaluation of sitagliptin in the treatment of patients with non-alcoholic fatty liver diseases without diabetes. *Frontiers in medicine*. 2022;9.
2. Mohammadi AAH, Jahromi SK, Gooraji SA, Bastani A. Comparison of the Therapeutic Effects of Melatonin, Metformin and Vitamin E on Non-Alcoholic Fatty Liver Disease: A Randomized Clinical Trial. *Journal of Advances in Medical and Biomedical Research*. 2022;30(140):232-40.
3. Lee MH, Neeland IJ, de Albuquerque Rocha N, Hughes C, Malloy CR, Jin ES. A randomized clinical trial evaluating the effect of empagliflozin on triglycerides in obese adults: Role of visceral fat. *Metabolism open*. 2022;13.
4. Taheri H, Malek M, Ismail-Beigi F, Zamani F, Sohrabi M, Reza Babaei M, et al. Effect of Empagliflozin on Liver Steatosis and Fibrosis in Patients With Non-Alcoholic Fatty Liver Disease Without Diabetes: A Randomized, Double-Blind, Placebo-Controlled Trial. *Adv Ther*. 2020;37(11):4697-708.

5. Khoo J, Hsiang JC, Taneja R, Koo SH, Soon GH, Kam CJ, et al. Randomized trial comparing effects of weight loss by liraglutide with lifestyle modification in non-alcoholic fatty liver disease. *Liver international : official journal of the International Association for the Study of the Liver*. 2019;39(5):941-9.
6. Anushiravani A, Haddadi N, Pourfarmanbar M, Mohammadkarimi V. Treatment options for nonalcoholic fatty liver disease: a double-blinded randomized placebo-controlled trial. *European journal of gastroenterology & hepatology*. 2019;31(5):613-7.
7. Yaghoubi M, Jafari S, Sajedi B, Gohari S, Akbarieh S, Heydari AH, et al. Comparison of fenofibrate and pioglitazone effects on patients with nonalcoholic fatty liver disease. *European Journal of Gastroenterology and Hepatology*. 2017;29(12):1385-8.
8. Shahebrahimi K, Zulnoorian S, Almasi A, Sharifi A, Keshvarz AA, Farshchian N. A comparison of the therapeutic effects of metformin, pioglitazone and vitamin E in patients with non-alcoholic fatty liver. *Journal of Babol University of Medical Sciences*. 2017;19(9):32-8.
9. Rana H, Yadav SS, Reddy HD, Singhal S, Singh DK, Usman K. Comparative effect of insulin sensitizers and statin on metabolic profile and ultrasonographical score in non alcoholic fatty liver disease. *Journal of clinical and diagnostic research*. 2016;10(8):OC19 - OC23.
10. Hussain M, Babar MZM, Hussain MS, Akhtar L. Vildagliptin ameliorates biochemical, metabolic and fatty changes associated with non alcoholic fatty liver disease. *Pakistan Journal of Medical Sciences*. 2016;32(6):1396-401.
11. Soifer E, Gavish D, Shargorodsky M. Does metformin treatment influence bone formation in patients with nonalcoholic fatty liver disease? *Horm Metab Res*. 2015;47(8):556-9.
12. Sanchez-Munoz V, Salas-Romero R, Del Villar-Morales A, Martinez-Coria E, Pegueros-Perez A, Franco-Sanchez JG. Decrease of liver fat content by aerobic exercise of metformin therapy in overweight or obese women (Disminución del contenido de grasa hepática mediante ejercicio aeróbico comparado con metformina en mujeres con sobrepeso u obesidad) (Spanish). *Revista De Investigacion Clinica-Clinical and Translational Investigation*. 2013;65(4):307-17.
13. Hajiaghamohammadi AA, Ziaee A, Oveisi S, Masroor H. Effects of metformin, pioglitazone, and silymarin treatment on non-alcoholic fatty liver disease: A randomized controlled pilot study. *Hepatitis monthly*. 2012;12(8).
14. Jin H, Zhou Y, Ming K. Efficacy of pioglitazone in treatment of 60 patients with nonalcoholic steatohepatitis. *Pharmaceutical care and research*. 2010;10(3):221 - 3.
15. Garinis GA, Fruci B, Mazza A, De Siena M, Abenavoli S, Gulletta E, et al. Metformin versus dietary treatment in nonalcoholic hepatic steatosis: a randomized study. *International journal of obesity (2005)*. 2010;34(8):1255-64.
16. Aithal GP, Thomas JA, Kaye PV, Lawson A, Ryder SD, Spendlove I, et al. Randomized, placebo-controlled trial of pioglitazone in nondiabetic subjects with nonalcoholic steatohepatitis. *Gastroenterology*. 2008;135(4):1176-84.
17. Cui KQ, Zhao XW, Zhang Y, Kang XH, Meng J, Chen XL. Efficacy of rosiglitazone in treatment of nonalcoholic fatty liver disease and its relations with adiponectin. *World chinese journal of digestology*. 2006;14(13):1326 - 9.

18. Uygun A, Kadayifci A, Isik AT, Ozgurtas T, Deveci S, Tuzun A, et al. Metformin in the treatment of patients with non-alcoholic steatohepatitis. *Alimentary pharmacology & therapeutics*. 2004;19(5):537 - 44.
